# Supplementary material for: The crystal structure and luminescence properties of the first lithium oxonitridolithosilicate Li3SiNO2:Eu2+
Source: Royal Society of Chemistry journal article supplement (doi:10.1039/d2dt03064k), 2022-01-01
Supplement: d2dt03064k1.pdf [file d2dt03064k1.pdf]

## Supporting Information

### Crystal structure and luminescence properties of the first lithium oxonitridolithosilicate $\text{Li}_3\text{SiNO}_2:\text{Eu}^{2+}$

**Daniel S. Wimmer** †<sup>[a]</sup>, **Kilian M. Rießbeck** †<sup>[a]</sup>, **Markus Seibald**<sup>[b]</sup>, **Dominik Baumann**<sup>[b]</sup>,  
**Klaus Wurst**<sup>[a]</sup>, **Gunter Heymann**<sup>[a]</sup>, and **Hubert Huppertz**<sup>\*[a]</sup>

[a] Daniel S. Wimmer, Kilian M. Rießbeck, Klaus Wurst, Gunter Heymann, Hubert Huppertz:  
Institut für Allgemeine, Anorganische und Theoretische Chemie,  
Universität Innsbruck  
Innrain 80-82, A-6020 Innsbruck, Austria  
E-Mail: *Hubert.Huppertz@uibk.ac.at*  
<https://www.uibk.ac.at/aatc/mitarbeiter/hub/>

[b] Markus Seibald, Dominik Baumann:  
ams-OSRAM International GmbH,  
Mittelstetter Weg 2, D-86830 Schwabmünchen, Germany

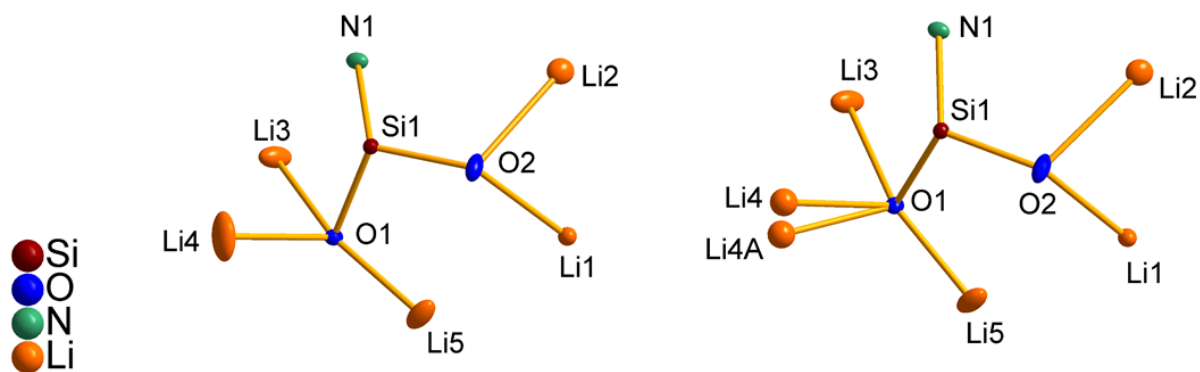

Figure S1: On the left, the asymmetric unit of  $\text{Li}_3\text{SiNO}_2$  with the asymmetric displacement ellipsoids by describing the Li4 position with one Li site. On the right, the asymmetric unit of  $\text{Li}_3\text{SiNO}_2$  with the asymmetric displacement ellipsoids by describing the Li4 position with two partially occupied Li sites (Li4 and Li4A). Li4 and Li4A are isotropically refined in the latter case.

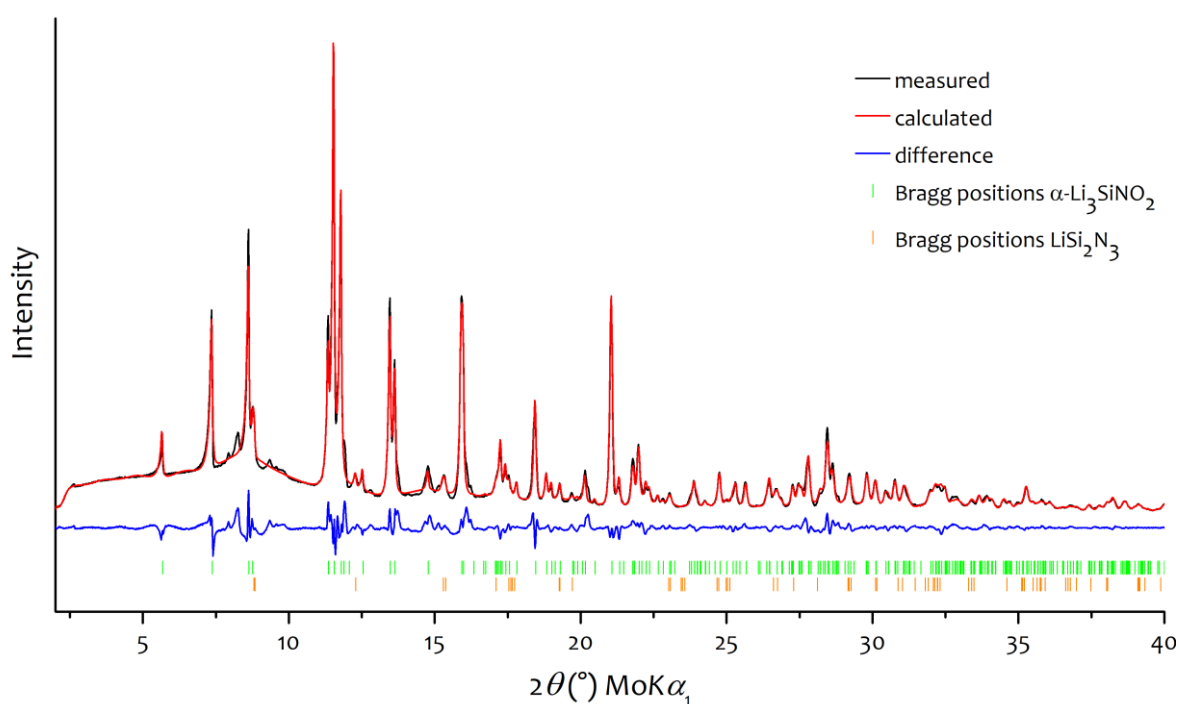

Figure S2: Rietveld fit of the measured powder diffraction data (black line), the calculated pattern based on single-crystal data of  $\text{Li}_3\text{SiNO}_2$  (red line), and the difference plot (blue line). Tick marks represent the theoretical reflection position of  $\text{Li}_3\text{SiNO}_2$  (green tick marks) and of the secondary phase  $\text{LiSi}_2\text{N}_3$  (orange tick marks).

Table S1: Crystallographic data for Rietveld refinement of  $\text{Li}_3\text{SiNO}_2$ 

| Composition / Empirical formula  |                                         |
|----------------------------------|-----------------------------------------|
| $\text{Li}_3\text{SiNO}_2$ / wt% | 97(1)                                   |
| $\text{LiSi}_2\text{N}_3$ / wt%  | 3(1)                                    |
| <b>Crystallographic data</b>     |                                         |
| Space group                      | $C2/c$                                  |
| Powder diffractometer            | STOE Stadi P                            |
| Radiation                        | Mo- $K\alpha_1$ ( $\lambda = 70.93$ pm) |
| $a$ / pm                         | 1054.84(7)                              |
| $b$ / pm                         | 1103.05(8)                              |
| $c$ / pm                         | 512.54(4)                               |
| $\beta$ / deg                    | 116.66(1)                               |
| $V$ / nm <sup>3</sup>            | 0.53296(7)                              |
| Profile range                    | $2.0 \leq 2\theta \leq 40.0$            |
| $2\theta$ step size / deg        | 0.015                                   |
| $R_{\text{exp}}$ / %             | 0.87                                    |
| $R_{\text{wp}}$ / %              | 7.80                                    |
| $R_{\text{p}}$ / %               | 5.35                                    |
| $R_{\text{Bragg}}$ / %           | 3.29                                    |

Table S2: Crystal data and structure refinement of single-crystal X-ray measurements at low temperature of  $\text{Li}_3\text{SiNO}_2$ .

| Empirical formula                       | $\text{Li}_3\text{SiNO}_2$             |
|-----------------------------------------|----------------------------------------|
| Molar mass / g mol <sup>-1</sup>        | 94.92                                  |
| Crystal system                          | monoclinic                             |
| Space group                             | $C2/c$                                 |
| <b>Single-crystal data</b>              |                                        |
| Single-crystal diffractometer           | Bruker D8 Quest Kappa                  |
| Radiation                               | Mo- $K\alpha$ ( $\lambda = 71.073$ pm) |
| $a$ / pm                                | 1048.47(4)                             |
| $b$ / pm                                | 1101.72(4)                             |
| $c$ / pm                                | 511.44(2)                              |
| $\beta$ / deg                           | 116.04(1)                              |
| $V$ / nm <sup>3</sup>                   | 0.53083(4)                             |
| Formula units per cell $Z$              | 8                                      |
| Calculated density / g cm <sup>-3</sup> | 2.375                                  |

|                                             |                             |
|---------------------------------------------|-----------------------------|
| Crystal size / mm <sup>3</sup>              | 0.200 × 0.070 × 0.070       |
| Temperature / K                             | 183(2)                      |
| Detector distance / mm                      | 40                          |
| Exposure time                               | 0.5° / frame ; 40 s / frame |
| Absorption coefficient / mm <sup>-1</sup>   | 0.605                       |
| $F(000) / e$                                | 368                         |
| $\Theta$ -range / deg                       | 2.85 – 41.32                |
| Range in $hkl$                              | $\pm 19, \pm 20, \pm 9$     |
| Reflections total/independent               | 26737 / 1760                |
| $R_{\text{int}}$                            | 0.0295                      |
| Reflections with $I \geq 2\sigma(I)$        | 1722                        |
| Data / ref. parameters                      | 1760 / 66                   |
| Absorption correction                       | MULTI-SCAN                  |
| Final $R_1 / wR_2 [I \geq 2\sigma(I)]$      | 0.0237 / 0.0726             |
| Final $R_1 / wR_2$ (all data)               | 0.0240 / 0.0727             |
| Goodness of fit on $F^2$                    | 1.290                       |
| Largest diff. peak/hole / e·Å <sup>-3</sup> | 0.532 / -0.521              |

Table S3: Wyckoff positions, atomic coordinates, and equivalent isotropic displacement parameters  $U_{eq}$  (Å<sup>2</sup>) of Li<sub>3</sub>SiNO<sub>2</sub> (standard deviations in parentheses) of single-crystal X-ray measurements at low temperature.

| Atom | Wyckoff-position | $x$        | $y$        | $z$           | $U_{eq}$   | Occ. |
|------|------------------|------------|------------|---------------|------------|------|
| Si1  | 8 <i>f</i>       | 0.22034(2) | 0.43053(2) | 0.25612(4)    | 0.00477(6) | 1    |
| Li1  | 4 <i>e</i>       | 0          | 0.2019(2)  | $\frac{3}{4}$ | 0.0073(3)  | 1    |
| Li2  | 4 <i>e</i>       | 0          | 0.9746(2)  | $\frac{3}{4}$ | 0.0103(3)  | 1    |
| Li3  | 4 <i>e</i>       | 0          | 0.4334(2)  | $\frac{3}{4}$ | 0.0148(4)  | 1    |
| Li4  | 4 <i>e</i>       | 0          | 0.6813(3)  | $\frac{3}{4}$ | 0.0130(4)  | 0.84 |
| Li4A | 4 <i>e</i>       | 0          | 0.725(2)   | $\frac{3}{4}$ | 0.014(2)   | 0.16 |
| Li5  | 8 <i>f</i>       | 0.2223(2)  | 0.3017(2)  | 0.7805(4)     | 0.0149(3)  | 1    |
| O1   | 8 <i>f</i>       | 0.12891(5) | 0.31225(4) | 0.0530(2)     | 0.00612(8) | 1    |
| O2   | 8 <i>f</i>       | 0.38857(6) | 0.39429(6) | 0.3739(2)     | 0.0103(2)  | 1    |
| N1   | 8 <i>f</i>       | 0.16863(6) | 0.44459(5) | 0.5301(2)     | 0.00641(9) | 1    |

Table S4: Anisotropic displacement parameters  $U_{ij}$  ( $\text{\AA}^2$ ) of  $\text{Li}_3\text{SiNO}_2$  (standard deviations in parentheses) of single-crystal X-ray measurements at low temperature. The displacement parameters of the atoms Li4 and Li4A were refined isotropically.

| Atom | $U_{11}$   | $U_{22}$   | $U_{33}$   | $U_{23}$    | $U_{13}$   | $U_{12}$   |
|------|------------|------------|------------|-------------|------------|------------|
| Si1  | 0.00493(8) | 0.00495(8) | 0.00451(8) | -0.00049(5) | 0.00214(6) | 0.00005(5) |
| Li1  | 0.0074(7)  | 0.0064(7)  | 0.0092(7)  | 0           | 0.0046(6)  | 0          |
| Li2  | 0.0106(8)  | 0.0121(8)  | 0.0064(7)  | 0           | 0.0020(6)  | 0          |
| Li3  | 0.0126(9)  | 0.0096(8)  | 0.014(2)   | 0           | -0.0011(7) | 0          |
| Li5  | 0.0182(7)  | 0.0149(7)  | 0.0152(7)  | 0.0070(5)   | 0.0107(6)  | 0.0083(5)  |
| O1   | 0.0064(2)  | 0.0053(2)  | 0.0062(2)  | -0.0007(2)  | 0.0025(2)  | -0.0001(2) |
| O2   | 0.0061(2)  | 0.0136(2)  | 0.0103(2)  | -0.0036(2)  | 0.0028(2)  | 0.0012(2)  |
| N1   | 0.0090(2)  | 0.0055(2)  | 0.0056(2)  | 0.0001(2)   | 0.0039(2)  | 0.0004(2)  |

Table S5: Interatomic distances ( $\text{\AA}$ ) in  $\text{Li}_3\text{SiNO}_2$  (standard deviations in parentheses) of single-crystal X-ray measurements at low temperature.

|                |                  |                |                  |                 |                 |
|----------------|------------------|----------------|------------------|-----------------|-----------------|
| Si1–O2         | 1.6434(6)        | Li3–O1         | 2.042(2) 2×      | Li4A–O1         | 2.051(4) 2×     |
| Si1–O1         | 1.6800(5)        | <b>Ø Li3–O</b> | <b>2.042(2)</b>  | Li4A–O2         | 2.56(2) 2×      |
| <b>Ø Si1–O</b> | <b>1.6617(6)</b> |                |                  | <b>Ø Li4A–O</b> | <b>2.31(2)</b>  |
|                |                  | Li3–N1         | 2.182(2) 2×      |                 |                 |
| Si1–N1         | 1.7172(6)        | Li3–N1         | 2.4802(6) 2×     | Li4A–N1         | 2.54(2) 2×      |
| Si1–N1         | 1.7242(6)        | <b>Ø Li3–N</b> | <b>2.331(6)</b>  | <b>Ø Li4A–N</b> | <b>2.54(2)</b>  |
| <b>Ø Si1–N</b> | <b>1.7207(6)</b> |                |                  |                 |                 |
|                |                  | Li4–O1         | 2.0108(5) 2×     | Li5–O1          | 1.889(2)        |
| Li1–O2         | 1.881(2)         | <b>Ø Li4–O</b> | <b>2.0108(5)</b> | Li5–O1          | 2.028(2)        |
| Li1–O1         | 1.967(2) 3×      |                |                  | Li5–O2          | 2.415(2)        |
| <b>Ø Li1–O</b> | <b>1.946(2)</b>  | Li4–N1         | 2.209(2) 2×      | <b>Ø Li5–O</b>  | <b>2.111(2)</b> |
|                |                  | <b>Ø Li4–N</b> | <b>2.209(2)</b>  |                 |                 |
| Li2–O2         | 1.968(2) 2×      |                |                  | Li5–N1          | 1.950(2)        |
| Li2–O2         | 2.122(2) 2×      |                |                  | <b>Ø Li5–N</b>  | <b>1.950(2)</b> |
| <b>Ø Li2–O</b> | <b>2.045(2)</b>  |                |                  |                 |                 |
